# Supplementary material for: Full-length isoform concatenation sequencing to resolve cancer transcriptome complexity
Source: PubMed Central journal article supplement (PMC10823626; doi:10.1186/s12864-024-10021-x), 2024-01-29
Supplement: 12864_2024_10021_MOESM16_ESM.pdf [file 12864_2024_10021_MOESM16_ESM.pdf]

**Supplemental Information**

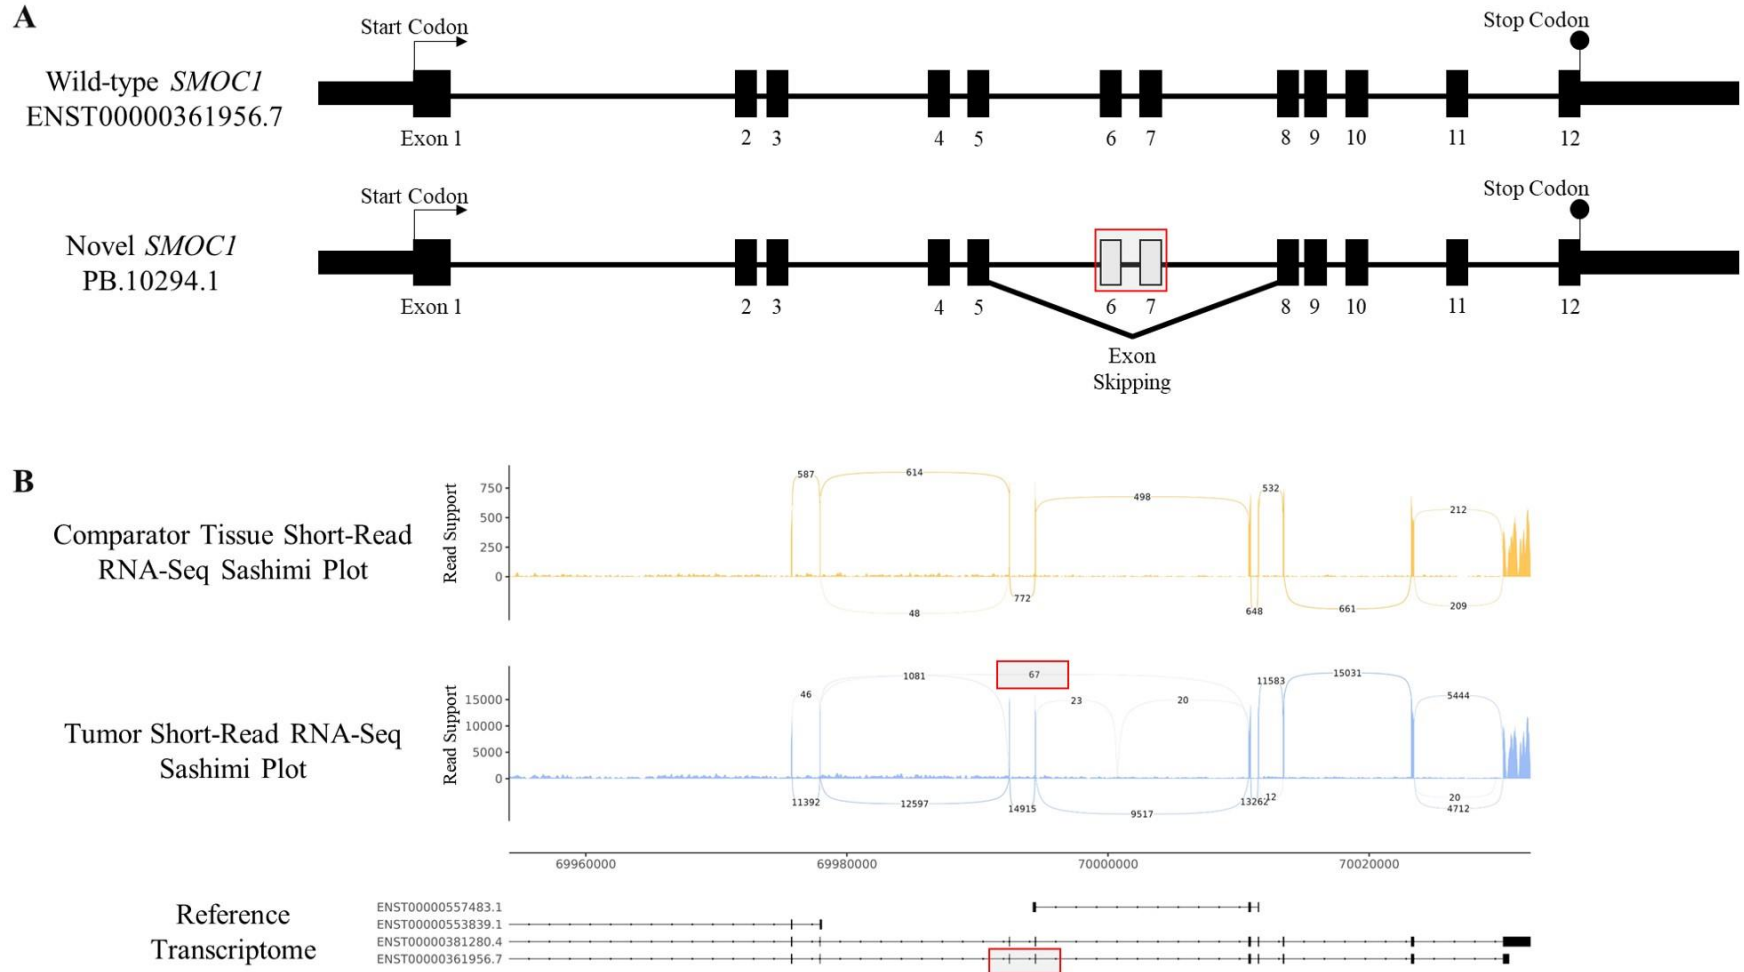

**Supplemental Figure 1.** (A) Illustration of the tumor-specific novel *SMOC1* isoform detected from the long-read PB\_FLIC-Seq workflow showing exon skipping of exons 6 and 7 (highlighted by red box). (B) Sashimi plot generated from tumor and adjacent tissue comparator short-read RNA-Seq data showing exon skipping (highlighted by red box) within tumor *SMOC1* expressed transcripts.

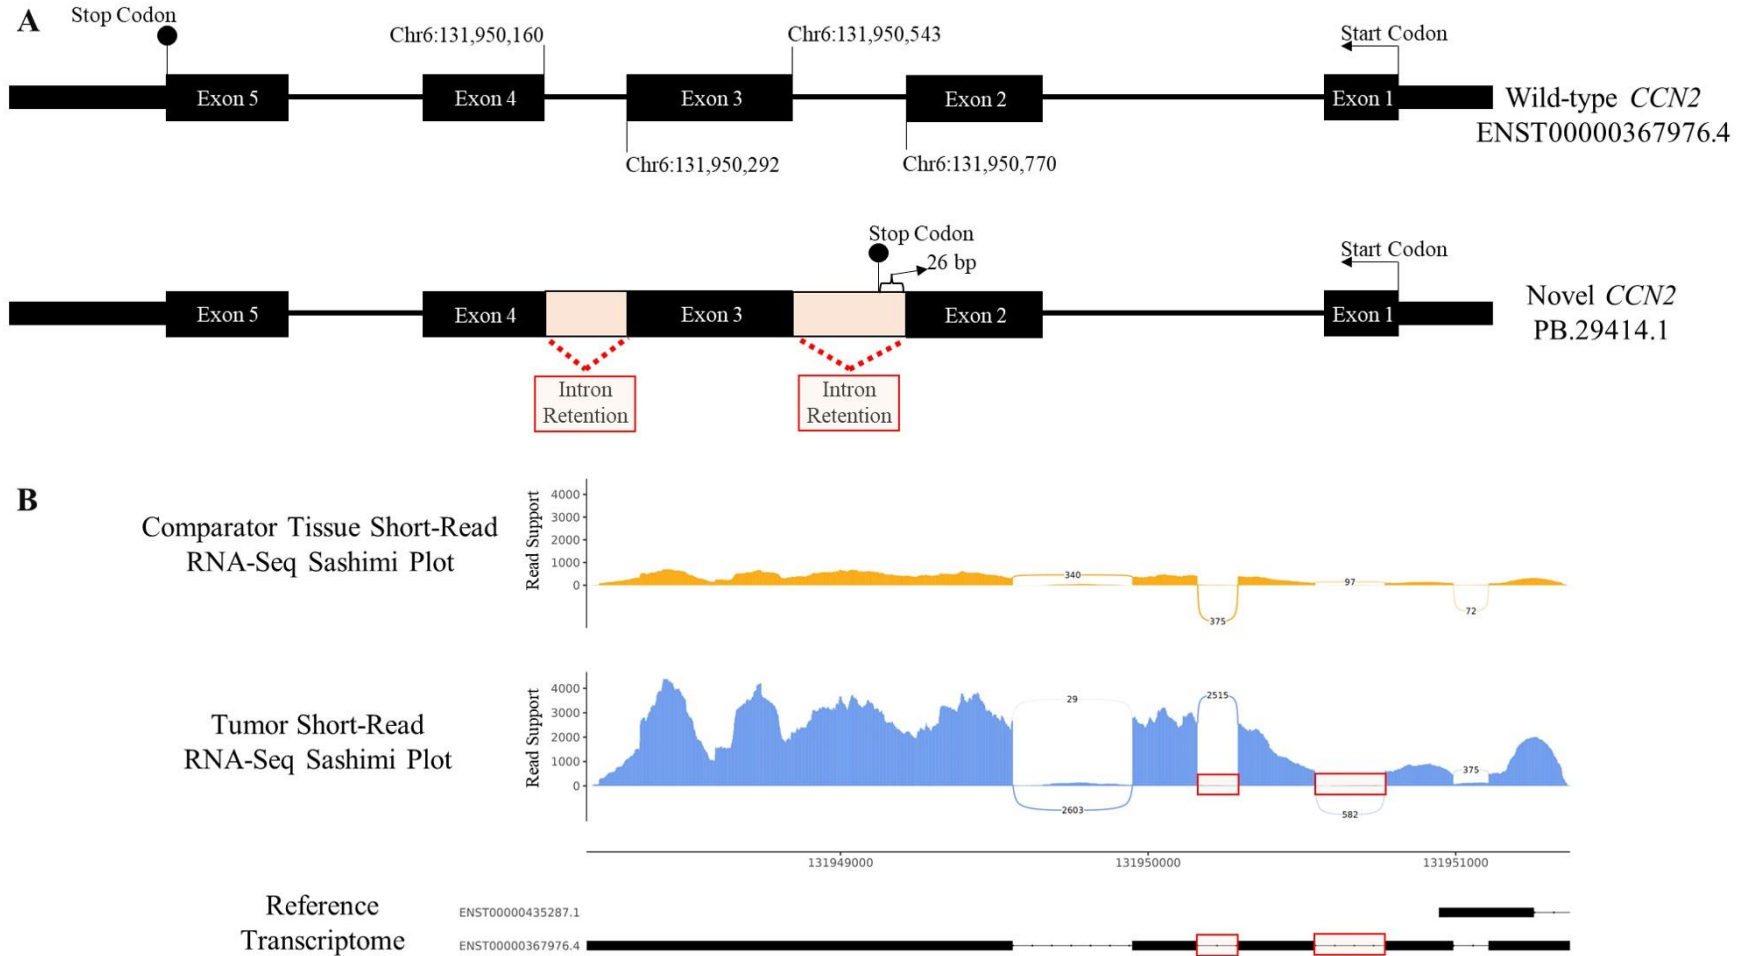

**Supplemental Figure 2.** (A) Illustration of the tumor-specific novel *CCN2* isoform detected from the long-read PB\_FLIC-Seq workflow showing intron retention of introns 2 and 3 (highlighted by light orange box). (B) Sashimi plot generated from tumor and adjacent tissue comparator short-read RNA-Seq data showing splicing events (red box highlights introns of interests) for expressed *CCN2* transcripts.
